# Supplementary material
Source: publisher figshare collection journal article supplement (https://asha.figshare.com/ndownloader/files/38843463)
Supplement: Supplementary file 1 [file 38843463]

## Supplemental Material S1. Sample vocabulary instructional script.

|                                                           |                                                                                                                                                                                                                                                                                                                                                                                                                                            |
|-----------------------------------------------------------|--------------------------------------------------------------------------------------------------------------------------------------------------------------------------------------------------------------------------------------------------------------------------------------------------------------------------------------------------------------------------------------------------------------------------------------------|
| Introduce the word                                        | Wow, it’s raining so hard that now I am all wet! The amount of rain is <b>excessive</b> . Too much means <b>excessive</b> .                                                                                                                                                                                                                                                                                                                |
| Direction to worksheet and verbal/moto-kinesthetic action | NARRATOR: Put your pencil on the clouds and trace the line to the cook and the dishes. If your pencil is on <b>excessive</b> , then say, “That’s way too much!”                                                                                                                                                                                                                                                                            |
| Repetition of vocabulary word                             | Draw another dish on the stack and repeat the new word. Did you say <b>excessive</b> ? Way to go!                                                                                                                                                                                                                                                                                                                                          |
| Definition and context                                    | <b>Excessive</b> means too much. Look at the man with the dirty dishes. What a mess! There’s too much to wash! He has an <b>excessive</b> amount of work to do. Has your teacher ever told you there was too much noise in the classroom? Your teacher says, “Quiet down!” when the noise is <b>excessive</b> . Abbie the Ant thinks there is an <b>excessive</b> amount of rain today. There is just too much water falling from the sky! |
| Expressive naming task                                    | ABBIE: Wow- there is too much rain today! Hey, do you remember the word that means too much? <b>Excessive</b> , that’s it! Remind me again what <b>excessive</b> means. Too much- you’re doing great!                                                                                                                                                                                                                                      |
| End of lesson review                                      | Another word for too much is.... <b>Excessive</b> . Now say “ <i>Too much!</i> ” Put your pencil on the cook and the dishes and color in the bubble. What does <b>excessive</b> mean? Too much- way to go!                                                                                                                                                                                                                                 |
